# Supplementary material
Source: Elsevier journal article supplement (http://library.osu.edu/projects/msa/suppmat/v242.i2.pp182-194/mmc2.pdf)
Supplement: mmc2 [file mmc2.pdf]

**Supplementary Table.** Measured  $^{23}\text{Na}^{39}\text{K } 3^1\Pi_{\Omega=1}(v=6, J, e/f)$  and  $3^3\Pi_{\Omega=0,1,2}(v=32, J, e/f)$  ro-vibrational level energies, along with ground state and intermediate state levels and PUMP and PROBE laser frequencies for each PFOODR transition studied in this work. Measured  $^{23}\text{Na}^{39}\text{K } 3^1\Pi_{\Omega=1}(v=6, J, e/f)$  and  $3^3\Pi_{\Omega=0,1,2}(v=32, J, e/f)$  level energies are compared to those determined from the deperturbation analysis described in the text.

### $^{23}\text{Na}^{39}\text{K } 3^1\Pi(v=6)$ Data

| $J$ | $\Omega$ | $e/f$    | intermediate state level<br>$1(b)^3\Pi(v, J)$ or<br>$2(A)^1\Sigma^+(v, J)$ or mixture | predominant character<br>(singlet or triplet) of mixed intermediate state | ground state level<br>$1(X)^1\Sigma^+(v, J)$ | ground state energy<br>( $\text{cm}^{-1}$ ) | PUMP laser frequency<br>( $\text{cm}^{-1}$ ) | PROBE laser frequency<br>( $\text{cm}^{-1}$ ) | $E[3^1\Pi(v=6, J)]$<br>measured value<br>( $\text{cm}^{-1}$ ) | $E[3^1\Pi(v=6, J)]$<br>from calculations<br>( $\text{cm}^{-1}$ ) | $E[\text{measured}] - E[\text{calculated}]$<br>( $\text{cm}^{-1}$ ) |
|-----|----------|----------|---------------------------------------------------------------------------------------|---------------------------------------------------------------------------|----------------------------------------------|---------------------------------------------|----------------------------------------------|-----------------------------------------------|---------------------------------------------------------------|------------------------------------------------------------------|---------------------------------------------------------------------|
| 9   | 1        | <i>e</i> | $2^1\Sigma^+(16, 10)$                                                                 |                                                                           | (0, 11)                                      | 74.3952                                     | 13349.1088                                   | 12401.7566                                    | 25825.2606                                                    | 25825.2563                                                       | 0.0043                                                              |
| 10  | 1        | <i>f</i> | $2^1\Sigma^+(16, 10)$                                                                 |                                                                           | (0, 11)                                      | 74.3952                                     | 13349.1088                                   | 12402.8419                                    | 25826.3459                                                    | 25826.3424                                                       | 0.0035                                                              |
| 11  | 1        | <i>e</i> | $2^1\Sigma^+(16, 10)$                                                                 |                                                                           | (0, 11)                                      | 74.3952                                     | 13349.1088                                   | 12404.0398                                    | 25827.5438                                                    | 25827.5413                                                       | 0.0025                                                              |
| 17  | 1        | <i>e</i> | $2^1\Sigma^+(16, 18)$                                                                 |                                                                           | (0, 17)                                      | 90.9088                                     | 13346.7649                                   | 12399.3112                                    | 25836.9849                                                    | 25836.9950                                                       | -0.0101                                                             |
| 17  | 1        | <i>e</i> | $2^1\Sigma^+(16, 18)$                                                                 |                                                                           | (0, 17)                                      | 90.9088                                     | 13346.7649                                   | 12399.3190                                    | 25836.9927                                                    | 25836.9950                                                       | -0.0023                                                             |
| 18  | 1        | <i>e</i> | $2^1\Sigma^+(16, 19)$                                                                 |                                                                           | (0, 18)                                      | 94.3237                                     | 13345.6738                                   | 12398.9460                                    | 25838.9435                                                    | 25838.9480                                                       | -0.0045                                                             |
| 18  | 1        | <i>e</i> | $2^1\Sigma^+(16, 19)$                                                                 |                                                                           | (0, 18)                                      | 94.3237                                     | 13345.6738                                   | 12398.9495                                    | 25838.9470                                                    | 25838.9480                                                       | -0.0010                                                             |
| 18  | 1        | <i>e</i> | $2^1\Sigma^+(16, 19)$                                                                 |                                                                           | (0, 18)                                      | 94.3237                                     | 13345.6738                                   | 12398.9479                                    | 25838.9454                                                    | 25838.9480                                                       | -0.0026                                                             |
| 18  | 1        | <i>e</i> | $2^1\Sigma^+(16, 19)$                                                                 |                                                                           | (0, 18)                                      | 94.3237                                     | 13345.6738                                   | 12398.9513                                    | 25838.9488                                                    | 25838.9480                                                       | 0.0008                                                              |
| 18  | 1        | <i>e</i> | $2^1\Sigma^+(16, 19)$                                                                 |                                                                           | (0, 20)                                      | 101.7207                                    | 13338.2768                                   | 12398.9541                                    | 25838.9516                                                    | 25838.9480                                                       | 0.0036                                                              |
| 18  | 1        | <i>e</i> | $2^1\Sigma^+(16, 19)$                                                                 |                                                                           | (0, 20)                                      | 101.7207                                    | 13338.2768                                   | 12398.9509                                    | 25838.9484                                                    | 25838.9480                                                       | 0.0004                                                              |
| 18  | 1        | <i>e</i> | $1^3\Pi(17, 19)\sim 2^1\Sigma^+(18, 19)$                                              | T                                                                         | (0, 20)                                      | 101.7207                                    | 13479.4727                                   | 12257.7478                                    | 25838.9412                                                    | 25838.9480                                                       | -0.0068                                                             |
| 18  | 1        | <i>e</i> | $1^3\Pi(17, 19)\sim 2^1\Sigma^+(18, 19)$                                              | T                                                                         | (0, 20)                                      | 101.7207                                    | 13479.4727                                   | 12257.7410                                    | 25838.9344                                                    | 25838.9480                                                       | -0.0136                                                             |
| 18  | 1        | <i>e</i> | $1^3\Pi(17, 19)\sim 2^1\Sigma^+(18, 19)$                                              | T                                                                         | (0, 20)                                      | 101.7207                                    | 13479.4727                                   | 12257.7411                                    | 25838.9345                                                    | 25838.9480                                                       | -0.0135                                                             |
| 18  | 1        | <i>f</i> | $2^1\Sigma^+(16, 18)$                                                                 |                                                                           | (0, 17)                                      | 90.9088                                     | 13346.7649                                   | 12401.2666                                    | 25838.9403                                                    | 25838.9412                                                       | -0.0009                                                             |
| 18  | 1        | <i>f</i> | $2^1\Sigma^+(16, 18)$                                                                 |                                                                           | (0, 17)                                      | 90.9088                                     | 13346.7649                                   | 12401.2608                                    | 25838.9345                                                    | 25838.9412                                                       | -0.0067                                                             |
| 18  | 1        | <i>f</i> | $2^1\Sigma^+(16, 18)$                                                                 |                                                                           | (0, 17)                                      | 90.9088                                     | 13346.7649                                   | 12401.2596                                    | 25838.9333                                                    | 25838.9412                                                       | -0.0079                                                             |
| 19  | 1        | <i>e</i> | $2^1\Sigma^+(16, 18)$                                                                 |                                                                           | (0, 17)                                      | 90.9088                                     | 13346.7649                                   | 12403.3175                                    | 25840.9912                                                    | 25840.9935                                                       | -0.0023                                                             |
| 19  | 1        | <i>e</i> | $2^1\Sigma^+(16, 18)$                                                                 |                                                                           | (0, 17)                                      | 90.9088                                     | 13346.7649                                   | 12403.3202                                    | 25840.9939                                                    | 25840.9935                                                       | 0.0004                                                              |
| 19  | 1        | <i>e</i> | $2^1\Sigma^+(16, 18)$                                                                 |                                                                           | (0, 17)                                      | 90.9088                                     | 13346.7649                                   | 12403.3094                                    | 25840.9831                                                    | 25840.9935                                                       | -0.0104                                                             |
| 19  | 1        | <i>e</i> | $1^3\Pi(17, 18)\sim 2^1\Sigma^+(18, 18)$                                              | S                                                                         | (0, 19)                                      | 97.9277                                     | 13488.6823                                   | 12254.3873                                    | 25840.9973                                                    | 25840.9935                                                       | 0.0038                                                              |
| 19  | 1        | <i>e</i> | $1^3\Pi(17, 20)\sim 2^1\Sigma^+(18, 20)$                                              | T                                                                         | (0, 19)                                      | 97.9277                                     | 13486.6555                                   | 12256.4253                                    | 25841.0085                                                    | 25840.9935                                                       | 0.0150                                                              |
| 19  | 1        | <i>e</i> | $1^3\Pi(17, 20)\sim 2^1\Sigma^+(18, 20)$                                              | T                                                                         | (0, 19)                                      | 97.9277                                     | 13486.6555                                   | 12256.4167                                    | 25840.9999                                                    | 25840.9935                                                       | 0.0064                                                              |
| 19  | 1        | <i>e</i> | $1^3\Pi(17, 20)\sim 2^1\Sigma^+(18, 20)$                                              | T                                                                         | (0, 19)                                      | 97.9277                                     | 13486.6555                                   | 12256.4113                                    | 25840.9945                                                    | 25840.9935                                                       | 0.0010                                                              |
| 19  | 1        | <i>e</i> | $1^3\Pi(17, 20)\sim 2^1\Sigma^+(18, 20)$                                              | S                                                                         | (0, 19)                                      | 97.9277                                     | 13493.6168                                   | 12249.4496                                    | 25840.9941                                                    | 25840.9935                                                       | 0.0006                                                              |
| 19  | 1        | <i>e</i> | $1^3\Pi(17, 20)\sim 2^1\Sigma^+(18, 20)$                                              | T                                                                         | (0, 21)                                      | 105.7026                                    | 13478.8761                                   | 12256.4106                                    | 25840.9893                                                    | 25840.9935                                                       | -0.0042                                                             |
| 19  | 1        | <i>f</i> | $2^1\Sigma^+(16, 19)$                                                                 |                                                                           | (0, 18)                                      | 94.3237                                     | 13345.6738                                   | 12400.9846                                    | 25840.9821                                                    | 25840.9887                                                       | -0.0066                                                             |
| 19  | 1        | <i>f</i> | $2^1\Sigma^+(16, 19)$                                                                 |                                                                           | (0, 18)                                      | 94.3237                                     | 13345.6738                                   | 12400.9858                                    | 25840.9833                                                    | 25840.9887                                                       | -0.0054                                                             |
| 19  | 1        | <i>f</i> | $2^1\Sigma^+(16, 19)$                                                                 |                                                                           | (0, 18)                                      | 94.3237                                     | 13345.6738                                   | 12400.9819                                    | 25840.9794                                                    | 25840.9887                                                       | -0.0093                                                             |

| $J$ | $\Omega$ | $ef$ | intermediate<br>state level<br>$1(b)^3\Pi(v, J)$ or<br>$2(A)^1\Sigma^+(v, J)$ or mixture | predominant<br>character<br>(singlet or<br>triplet) of<br>mixed<br>intermediate<br>state | ground<br>state level<br>$1(X)^1\Sigma^+(v, J)$ | ground<br>state level<br>energy<br>( $\text{cm}^{-1}$ ) | PUMP<br>laser<br>frequency<br>( $\text{cm}^{-1}$ ) | PROBE<br>laser<br>frequency<br>( $\text{cm}^{-1}$ ) | $E[3^1\Pi(v=6, J)]$<br>measured<br>value<br>( $\text{cm}^{-1}$ ) | $E[3^1\Pi(v=6, J)]$<br>from<br>calculations<br>( $\text{cm}^{-1}$ ) | $E[\text{measured}]$<br>–<br>$E[\text{calculated}]$<br>( $\text{cm}^{-1}$ ) |
|-----|----------|------|------------------------------------------------------------------------------------------|------------------------------------------------------------------------------------------|-------------------------------------------------|---------------------------------------------------------|----------------------------------------------------|-----------------------------------------------------|------------------------------------------------------------------|---------------------------------------------------------------------|-----------------------------------------------------------------------------|
| 19  | 1        | $f$  | $2^1\Sigma^+(16, 19)$                                                                    |                                                                                          | (0, 18)                                         | 94.3237                                                 | 13345.6738                                         | 12400.9856                                          | 25840.9831                                                       | 25840.9887                                                          | -0.0056                                                                     |
| 19  | 1        | $f$  | $2^1\Sigma^+(16, 19)$                                                                    |                                                                                          | (0, 20)                                         | 101.7207                                                | 13338.2768                                         | 12400.9853                                          | 25840.9836                                                       | 25840.9887                                                          | -0.0051                                                                     |
| 19  | 1        | $f$  | $2^1\Sigma^+(16, 19)$                                                                    |                                                                                          | (0, 20)                                         | 101.7207                                                | 13338.2768                                         | 12400.9874                                          | 25840.9849                                                       | 25840.9887                                                          | -0.0038                                                                     |
| 19  | 1        | $f$  | $1^3\Pi(17, 19)\sim 2^1\Sigma^+(18, 19)$                                                 | T                                                                                        | (0, 20)                                         | 101.7207                                                | 13479.4727                                         | 12259.7759                                          | 25840.9693                                                       | 25840.9887                                                          | -0.0194                                                                     |
| 19  | 1        | $f$  | $1^3\Pi(17, 19)\sim 2^1\Sigma^+(18, 19)$                                                 | T                                                                                        | (0, 20)                                         | 101.7207                                                | 13479.4727                                         | 12259.7885                                          | 25840.9819                                                       | 25840.9887                                                          | -0.0068                                                                     |
| 20  | 1        | $e$  | $2^1\Sigma^+(16, 19)$                                                                    |                                                                                          | (0, 18)                                         | 94.3237                                                 | 13345.6738                                         | 12403.1801                                          | 25843.1776                                                       | 25843.1799                                                          | -0.0023                                                                     |
| 20  | 1        | $e$  | $2^1\Sigma^+(16, 19)$                                                                    |                                                                                          | (0, 18)                                         | 94.3237                                                 | 13345.6738                                         | 12403.1794                                          | 25843.1769                                                       | 25843.1799                                                          | -0.0030                                                                     |
| 20  | 1        | $e$  | $2^1\Sigma^+(16, 19)$                                                                    |                                                                                          | (0, 18)                                         | 94.3237                                                 | 13345.6738                                         | 12403.1808                                          | 25843.1783                                                       | 25843.1799                                                          | -0.0016                                                                     |
| 20  | 1        | $e$  | $2^1\Sigma^+(16, 19)$                                                                    |                                                                                          | (0, 18)                                         | 94.3237                                                 | 13345.6738                                         | 12403.1830                                          | 25843.1805                                                       | 25843.1799                                                          | 0.0006                                                                      |
| 20  | 1        | $e$  | $2^1\Sigma^+(16, 19)$                                                                    |                                                                                          | (0, 20)                                         | 101.7207                                                | 13338.2768                                         | 12403.1827                                          | 25843.1802                                                       | 25843.1799                                                          | 0.0003                                                                      |
| 20  | 1        | $e$  | $2^1\Sigma^+(16, 19)$                                                                    |                                                                                          | (0, 20)                                         | 101.7207                                                | 13338.2768                                         | 12403.1829                                          | 25843.1804                                                       | 25843.1799                                                          | 0.0005                                                                      |
| 20  | 1        | $e$  | $2^1\Sigma^+(16, 19)$                                                                    |                                                                                          | (0, 20)                                         | 101.7207                                                | 13338.2768                                         | 12403.1843                                          | 25843.1818                                                       | 25843.1799                                                          | 0.0019                                                                      |
| 20  | 1        | $e$  | $1^3\Pi(17, 19)\sim 2^1\Sigma^+(18, 19)$                                                 | T                                                                                        | (0, 20)                                         | 101.7207                                                | 13479.4727                                         | 12261.9806                                          | 25843.1740                                                       | 25843.1799                                                          | -0.0059                                                                     |
| 20  | 1        | $e$  | $1^3\Pi(17, 19)\sim 2^1\Sigma^+(18, 19)$                                                 | T                                                                                        | (0, 20)                                         | 101.7207                                                | 13479.4727                                         | 12261.9693                                          | 25843.1627                                                       | 25843.1799                                                          | -0.0172                                                                     |
| 20  | 1        | $e$  | $1^3\Pi(17, 19)\sim 2^1\Sigma^+(18, 19)$                                                 | T                                                                                        | (0, 20)                                         | 101.7207                                                | 13479.4727                                         | 12261.9713                                          | 25843.1647                                                       | 25843.1799                                                          | -0.0152                                                                     |
| 20  | 1        | $e$  | $1^3\Pi(17, 21)\sim 2^1\Sigma^+(18, 21)$                                                 | T                                                                                        | (0, 20)                                         | 101.7207                                                | 13486.3459                                         | 12255.1101                                          | 25843.1767                                                       | 25843.1799                                                          | -0.0032                                                                     |
| 20  | 1        | $e$  | $1^3\Pi(17, 21)\sim 2^1\Sigma^+(18, 21)$                                                 | T                                                                                        | (0, 20)                                         | 101.7207                                                | 13486.3459                                         | 12255.1083                                          | 25843.1749                                                       | 25843.1799                                                          | -0.0050                                                                     |
| 20  | 1        | $e$  | $1^3\Pi(17, 21)\sim 2^1\Sigma^+(18, 21)$                                                 | T                                                                                        | (0, 22)                                         | 109.8732                                                | 13478.1874                                         | 12255.1103                                          | 25843.1709                                                       | 25843.1799                                                          | -0.0090                                                                     |
| 20  | 1        | $e$  | $1^3\Pi(17, 21)\sim 2^1\Sigma^+(18, 21)$                                                 | T                                                                                        | (0, 22)                                         | 109.8732                                                | 13478.1874                                         | 12255.1129                                          | 25843.1735                                                       | 25843.1799                                                          | -0.0064                                                                     |
| 26  | 1        | $e$  | $2^1\Sigma^+(16, 27)$                                                                    |                                                                                          | (0, 28)                                         | 138.8539                                                | 13324.0399                                         | 12395.5339                                          | 25858.4277                                                       | 25858.4360                                                          | -0.0083                                                                     |
| 26  | 1        | $f$  | $2^1\Sigma^+(16, 26)$                                                                    |                                                                                          | (0, 25)                                         | 123.5164                                                | 13336.0915                                         | 12398.8191                                          | 25858.4270                                                       | 25858.4221                                                          | 0.0049                                                                      |
| 27  | 1        | $e$  | $2^1\Sigma^+(16, 26)$                                                                    |                                                                                          | (0, 25)                                         | 123.5164                                                | 13336.0915                                         | 12401.7387                                          | 25861.3466                                                       | 25861.3489                                                          | -0.0023                                                                     |
| 27  | 1        | $e$  | $2^1\Sigma^+(16, 26)$                                                                    |                                                                                          | (0, 25)                                         | 123.5164                                                | 13336.0915                                         | 12401.7409                                          | 25861.3488                                                       | 25861.3489                                                          | -0.0001                                                                     |
| 27  | 1        | $f$  | $2^1\Sigma^+(16, 27)$                                                                    |                                                                                          | (0, 26)                                         | 128.4408                                                | 13334.4530                                         | 12398.4371                                          | 25861.3309                                                       | 25861.3340                                                          | -0.0031                                                                     |
| 27  | 1        | $f$  | $2^1\Sigma^+(16, 27)$                                                                    |                                                                                          | (0, 26)                                         | 128.4408                                                | 13334.4530                                         | 12398.4362                                          | 25861.3300                                                       | 25861.3340                                                          | -0.0040                                                                     |
| 27  | 1        | $f$  | $2^1\Sigma^+(16, 27)$                                                                    |                                                                                          | (0, 26)                                         | 128.4408                                                | 13334.4530                                         | 12398.4321                                          | 25861.3259                                                       | 25861.3340                                                          | -0.0081                                                                     |
| 27  | 1        | $f$  | $2^1\Sigma^+(16, 27)$                                                                    |                                                                                          | (0, 28)                                         | 138.8539                                                | 13324.0399                                         | 12398.4344                                          | 25861.3282                                                       | 25861.3340                                                          | -0.0058                                                                     |
| 28  | 1        | $e$  | $2^1\Sigma^+(16, 27)$                                                                    |                                                                                          | (0, 28)                                         | 138.8539                                                | 13324.0399                                         | 12401.4820                                          | 25864.3758                                                       | 25864.3885                                                          | -0.0127                                                                     |
| 28  | 1        | $e$  | $2^1\Sigma^+(16, 27)$                                                                    |                                                                                          | (0, 28)                                         | 138.8539                                                | 13324.0399                                         | 12401.4825                                          | 25864.3763                                                       | 25864.3885                                                          | -0.0122                                                                     |
| 28  | 1        | $f$  | $2^1\Sigma^+(16, 28)$                                                                    |                                                                                          | (0, 27)                                         | 133.5534                                                | 13332.7417                                         | 12398.0731                                          | 25864.3682                                                       | 25864.3736                                                          | -0.0054                                                                     |
| 28  | 1        | $f$  | $2^1\Sigma^+(16, 28)$                                                                    |                                                                                          | (0, 27)                                         | 133.5534                                                | 13332.7417                                         | 12398.0734                                          | 25864.3685                                                       | 25864.3736                                                          | -0.0051                                                                     |
| 29  | 1        | $e$  | $2^1\Sigma^+(16, 30)$                                                                    |                                                                                          | (0, 31)                                         | 155.8817                                                | 13317.5770                                         | 12394.0477                                          | 25867.5064                                                       | 25867.5066                                                          | -0.0002                                                                     |
| 29  | 1        | $e$  | $2^1\Sigma^+(16, 30)$                                                                    |                                                                                          | (0, 31)                                         | 155.8817                                                | 13317.5770                                         | 12394.0304                                          | 25867.4891                                                       | 25867.5066                                                          | -0.0175                                                                     |
| 29  | 1        | $e$  | $2^1\Sigma^+(16, 30)$                                                                    |                                                                                          | (0, 31)                                         | 155.8817                                                | 13317.5770                                         | 12394.0312                                          | 25867.4899                                                       | 25867.5066                                                          | -0.0167                                                                     |
| 29  | 1        | $e$  | $2^1\Sigma^+(16, 30)$                                                                    |                                                                                          | (0, 31)                                         | 155.8817                                                | 13317.5770                                         | 12394.0336                                          | 25867.4923                                                       | 25867.5066                                                          | -0.0143                                                                     |
| 30  | 1        | $f$  | $2^1\Sigma^+(16, 30)$                                                                    |                                                                                          | (0, 31)                                         | 155.8817                                                | 13317.5770                                         | 12397.2682                                          | 25870.7269                                                       | 25870.7198                                                          | 0.0071                                                                      |
| 31  | 1        | $e$  | $2^1\Sigma^+(16, 30)$                                                                    |                                                                                          | (0, 31)                                         | 155.8817                                                | 13317.5770                                         | 12400.6214                                          | 25874.0801                                                       | 25874.0762                                                          | 0.0039                                                                      |
| 33  | 1        | $e$  | $2^1\Sigma^+(16, 34)$                                                                    |                                                                                          | (0, 33)                                         | 168.1706                                                | 13321.0645                                         | 12391.7923                                          | 25881.0274                                                       | 25881.0671                                                          | -0.0397                                                                     |
| 34  | 1        | $e$  | $2^1\Sigma^+(16, 35)$                                                                    |                                                                                          | (0, 34)                                         | 174.5956                                                | 13318.8890                                         | 12391.2221                                          | 25884.7067                                                       | 25884.7186                                                          | -0.0119                                                                     |

| $J$ | $\Omega$ | $e/f$    | intermediate state level<br>$1(b)^3\Pi(v, J)$ or<br>$2(A)^1\Sigma^+(v, J)$ or mixture | predominant character<br>(singlet or triplet) of mixed intermediate state | ground state level<br>$1(X)^1\Sigma^+(v, J)$ | ground state level energy<br>( $\text{cm}^{-1}$ ) | PUMP laser frequency<br>( $\text{cm}^{-1}$ ) | PROBE laser frequency<br>( $\text{cm}^{-1}$ ) | $E[3^1\Pi(v=6, J)]$<br>measured value<br>( $\text{cm}^{-1}$ ) | $E[3^1\Pi(v=6, J)]$<br>from calculations<br>( $\text{cm}^{-1}$ ) | $E[\text{measured}] - E[\text{calculated}]$<br>( $\text{cm}^{-1}$ ) |
|-----|----------|----------|---------------------------------------------------------------------------------------|---------------------------------------------------------------------------|----------------------------------------------|---------------------------------------------------|----------------------------------------------|-----------------------------------------------|---------------------------------------------------------------|------------------------------------------------------------------|---------------------------------------------------------------------|
| 34  | 1        | <i>e</i> | $2^1\Sigma^+(16, 35)$                                                                 |                                                                           | (0, 34)                                      | 174.5956                                          | 13318.8890                                   | 12391.2217                                    | 25884.7063                                                    | 25884.7186                                                       | -0.0123                                                             |
| 34  | 1        | <i>f</i> | $2^1\Sigma^+(16, 34)$                                                                 |                                                                           | (0, 33)                                      | 168.1706                                          | 13321.0645                                   | 12395.4599                                    | 25884.6950                                                    | 25884.6950                                                       | 0.0000                                                              |
| 34  | 1        | <i>f</i> | $2^1\Sigma^+(16, 34)$                                                                 |                                                                           | (0, 33)                                      | 168.1706                                          | 13321.0645                                   | 12395.4576                                    | 25884.6927                                                    | 25884.6950                                                       | -0.0023                                                             |
| 35  | 1        | <i>e</i> | $2^1\Sigma^+(16, 34)$                                                                 |                                                                           | (0, 33)                                      | 168.1706                                          | 13321.0645                                   | 12399.2256                                    | 25888.4607                                                    | 25888.4807                                                       | -0.0200                                                             |
| 35  | 1        | <i>e</i> | $2^1\Sigma^+(16, 34)$                                                                 |                                                                           | (0, 33)                                      | 168.1706                                          | 13321.0645                                   | 12399.2247                                    | 25888.4598                                                    | 25888.4807                                                       | -0.0209                                                             |
| 35  | 1        | <i>f</i> | $2^1\Sigma^+(16, 35)$                                                                 |                                                                           | (0, 34)                                      | 174.5956                                          | 13318.8890                                   | 12394.9684                                    | 25888.4530                                                    | 25888.4559                                                       | -0.0029                                                             |
| 35  | 1        | <i>f</i> | $2^1\Sigma^+(16, 35)$                                                                 |                                                                           | (0, 34)                                      | 174.5956                                          | 13318.8890                                   | 12394.9721                                    | 25888.4567                                                    | 25888.4559                                                       | 0.0008                                                              |
| 35  | 1        | <i>f</i> | $2^1\Sigma^+(16, 35)$                                                                 |                                                                           | (0, 34)                                      | 174.5956                                          | 13318.8890                                   | 12394.9721                                    | 25888.4567                                                    | 25888.4559                                                       | 0.0008                                                              |
| 35  | 1        | <i>f</i> | $2^1\Sigma^+(16, 35)$                                                                 |                                                                           | (0, 34)                                      | 174.5956                                          | 13318.8890                                   | 12394.9710                                    | 25888.4556                                                    | 25888.4559                                                       | -0.0003                                                             |
| 36  | 1        | <i>e</i> | $2^1\Sigma^+(16, 35)$                                                                 |                                                                           | (0, 36)                                      | 188.0058                                          | 13305.4788                                   | 12398.8457                                    | 25892.3303                                                    | 25892.3393                                                       | -0.0090                                                             |
| 42  | 1        | <i>e</i> | $2^1\Sigma^+(17, 43)$                                                                 |                                                                           | (1, 44)                                      | 371.2133                                          | 13236.4530                                   | 12310.0171                                    | 25917.6834                                                    | 25917.6713                                                       | 0.0121                                                              |
| 43  | 1        | <i>f</i> | $2^1\Sigma^+(17, 43)$                                                                 |                                                                           | (1, 44)                                      | 371.2133                                          | 13236.4530                                   | 12314.5816                                    | 25922.2479                                                    | 25922.2139                                                       | 0.0340                                                              |
| 44  | 1        | <i>e</i> | $2^1\Sigma^+(17, 43)$                                                                 |                                                                           | (1, 44)                                      | 371.2133                                          | 13236.4530                                   | 12319.2831                                    | 25926.9494                                                    | 25926.9336                                                       | 0.0158                                                              |
| 55  | 1        | <i>e</i> | $2^1\Sigma^+(16, 56)$                                                                 |                                                                           | (0, 55)                                      | 352.3482                                          | 13257.5979                                   | 12375.1011                                    | 25985.0472                                                    | 25985.0264                                                       | 0.0208                                                              |
| 56  | 1        | <i>f</i> | $2^1\Sigma^+(16, 56)$                                                                 |                                                                           | (0, 55)                                      | 352.3482                                          | 13257.5979                                   | 12380.9407                                    | 25990.8868                                                    | 25990.8328                                                       | 0.0540                                                              |
| 57  | 1        | <i>e</i> | $2^1\Sigma^+(16, 56)$                                                                 |                                                                           | (0, 55)                                      | 352.3482                                          | 13257.5979                                   | 12386.9404                                    | 25996.8865                                                    | 25996.8632                                                       | 0.0233                                                              |

$^{23}\text{Na}^{39}\text{K } 3^3\Pi_{\Omega}(v=32)$  Data

| $J$ | $\Omega$ | $e/f$    | intermediate<br>state level<br>$1(b)^3\Pi(v, J)$ or<br>$2(A)^1\Sigma^+(v, J)$ or mixture | predominant<br>character<br>(singlet or<br>triplet) of<br>mixed<br>intermediate<br>state | ground<br>state level<br>$1(X)^1\Sigma^+(v, J)$ | ground<br>state level<br>energy<br>( $\text{cm}^{-1}$ ) | PUMP<br>laser<br>frequency<br>( $\text{cm}^{-1}$ ) | PROBE<br>laser<br>frequency<br>( $\text{cm}^{-1}$ ) | $E[3^1\Pi(v=6, J)]$<br>measured<br>value<br>( $\text{cm}^{-1}$ ) | $E[3^1\Pi(v=6, J)]$<br>from<br>calculations<br>( $\text{cm}^{-1}$ ) | $E[\text{measured}]$<br>–<br>$E[\text{calculated}]$<br>( $\text{cm}^{-1}$ ) |
|-----|----------|----------|------------------------------------------------------------------------------------------|------------------------------------------------------------------------------------------|-------------------------------------------------|---------------------------------------------------------|----------------------------------------------------|-----------------------------------------------------|------------------------------------------------------------------|---------------------------------------------------------------------|-----------------------------------------------------------------------------|
| 17  | 0        | <i>e</i> | $2^1\Sigma^+(16, 18)$                                                                    |                                                                                          | (0, 17)                                         | 90.9088                                                 | 13346.7649                                         | 12399.9779                                          | 25837.6516                                                       | 25837.6824                                                          | -0.0308                                                                     |
| 17  | 0        | <i>e</i> | $2^1\Sigma^+(16, 18)$                                                                    |                                                                                          | (0, 17)                                         | 90.9088                                                 | 13346.7649                                         | 12399.9769                                          | 25837.6506                                                       | 25837.6824                                                          | -0.0318                                                                     |
| 18  | 0        | <i>e</i> | $2^1\Sigma^+(16, 19)$                                                                    |                                                                                          | (0, 18)                                         | 94.3237                                                 | 13345.6738                                         | 12399.2979                                          | 25839.2954                                                       | 25839.3073                                                          | -0.0119                                                                     |
| 18  | 0        | <i>e</i> | $2^1\Sigma^+(16, 19)$                                                                    |                                                                                          | (0, 18)                                         | 94.3237                                                 | 13345.6738                                         | 12399.2991                                          | 25839.2966                                                       | 25839.3073                                                          | -0.0107                                                                     |
| 18  | 0        | <i>e</i> | $2^1\Sigma^+(16, 19)$                                                                    |                                                                                          | (0, 18)                                         | 94.3237                                                 | 13345.6738                                         | 12399.2988                                          | 25839.2963                                                       | 25839.3073                                                          | -0.0110                                                                     |
| 18  | 0        | <i>e</i> | $2^1\Sigma^+(16, 19)$                                                                    |                                                                                          | (0, 20)                                         | 101.7207                                                | 13338.2768                                         | 12399.3037                                          | 25839.3012                                                       | 25839.3073                                                          | -0.0061                                                                     |
| 18  | 0        | <i>e</i> | $2^1\Sigma^+(16, 19)$                                                                    |                                                                                          | (0, 20)                                         | 101.7207                                                | 13338.2768                                         | 12399.3052                                          | 25839.3027                                                       | 25839.3073                                                          | -0.0046                                                                     |
| 18  | 0        | <i>e</i> | $1^3\Pi(17, 19)\sim 2^1\Sigma^+(18, 19)$                                                 | T                                                                                        | (0, 20)                                         | 101.7207                                                | 13479.4727                                         | 12258.1019                                          | 25839.2953                                                       | 25839.3073                                                          | -0.0120                                                                     |
| 18  | 0        | <i>e</i> | $1^3\Pi(17, 19)\sim 2^1\Sigma^+(18, 19)$                                                 | T                                                                                        | (0, 20)                                         | 101.7207                                                | 13479.4727                                         | 12258.1011                                          | 25839.2945                                                       | 25839.3073                                                          | -0.0128                                                                     |
| 18  | 0        | <i>e</i> | $1^3\Pi(17, 19)\sim 2^1\Sigma^+(18, 19)$                                                 | T                                                                                        | (0, 20)                                         | 101.7207                                                | 13479.4727                                         | 12258.0924                                          | 25839.2858                                                       | 25839.3073                                                          | -0.0215                                                                     |
| 18  | 0        | <i>e</i> | $1^3\Pi(17, 19)\sim 2^1\Sigma^+(18, 19)$                                                 | T                                                                                        | (0, 20)                                         | 101.7207                                                | 13479.4727                                         | 12258.0925                                          | 25839.2859                                                       | 25839.3073                                                          | -0.0214                                                                     |
| 18  | 0        | <i>f</i> | $2^1\Sigma^+(16, 18)$                                                                    |                                                                                          | (0, 17)                                         | 90.9088                                                 | 13346.7649                                         | 12401.5984                                          | 25839.2721                                                       | 25839.3073                                                          | -0.0352                                                                     |
| 19  | 0        | <i>e</i> | $2^1\Sigma^+(16, 18)$                                                                    |                                                                                          | (0, 17)                                         | 90.9088                                                 | 13346.7649                                         | 12403.3597                                          | 25841.0334                                                       | 25841.0339                                                          | -0.0005                                                                     |
| 19  | 0        | <i>e</i> | $2^1\Sigma^+(16, 18)$                                                                    |                                                                                          | (0, 17)                                         | 90.9088                                                 | 13346.7649                                         | 12403.3531                                          | 25841.0268                                                       | 25841.0339                                                          | -0.0071                                                                     |
| 19  | 0        | <i>e</i> | $1^3\Pi(17, 18)\sim 2^1\Sigma^+(18, 18)$                                                 | T                                                                                        | (0, 19)                                         | 97.9277                                                 | 13480.0377                                         | 12263.0694                                          | 25841.0348                                                       | 25841.0339                                                          | 0.0009                                                                      |
| 19  | 0        | <i>e</i> | $1^3\Pi(17, 18)\sim 2^1\Sigma^+(18, 18)$                                                 | T                                                                                        | (0, 19)                                         | 97.9277                                                 | 13480.0377                                         | 12263.0607                                          | 25841.0261                                                       | 25841.0339                                                          | -0.0078                                                                     |
| 19  | 0        | <i>e</i> | $1^3\Pi(17, 18)\sim 2^1\Sigma^+(18, 18)$                                                 | S                                                                                        | (0, 19)                                         | 97.9277                                                 | 13488.6823                                         | 12254.4301                                          | 25841.0401                                                       | 25841.0339                                                          | 0.0062                                                                      |
| 19  | 0        | <i>e</i> | $1^3\Pi(17, 20)\sim 2^1\Sigma^+(18, 20)$                                                 | S                                                                                        | (0, 19)                                         | 97.9277                                                 | 13493.6168                                         | 12249.4929                                          | 25841.0374                                                       | 25841.0339                                                          | 0.0035                                                                      |
| 19  | 0        | <i>f</i> | $2^1\Sigma^+(16, 19)$                                                                    |                                                                                          | (0, 18)                                         | 94.3237                                                 | 13345.6738                                         | 12401.0245                                          | 25841.0220                                                       | 25841.0311                                                          | -0.0091                                                                     |
| 19  | 0        | <i>f</i> | $2^1\Sigma^+(16, 19)$                                                                    |                                                                                          | (0, 18)                                         | 94.3237                                                 | 13345.6738                                         | 12401.0251                                          | 25841.0226                                                       | 25841.0311                                                          | -0.0085                                                                     |
| 19  | 0        | <i>f</i> | $2^1\Sigma^+(16, 19)$                                                                    |                                                                                          | (0, 18)                                         | 94.3237                                                 | 13345.6738                                         | 12401.0227                                          | 25841.0202                                                       | 25841.0311                                                          | -0.0109                                                                     |
| 19  | 0        | <i>f</i> | $2^1\Sigma^+(16, 19)$                                                                    |                                                                                          | (0, 18)                                         | 94.3237                                                 | 13345.6738                                         | 12401.0238                                          | 25841.0213                                                       | 25841.0311                                                          | -0.0098                                                                     |
| 19  | 0        | <i>f</i> | $2^1\Sigma^+(16, 19)$                                                                    |                                                                                          | (0, 20)                                         | 101.7207                                                | 13338.2768                                         | 12401.0248                                          | 25841.0223                                                       | 25841.0311                                                          | -0.0088                                                                     |
| 19  | 0        | <i>f</i> | $2^1\Sigma^+(16, 19)$                                                                    |                                                                                          | (0, 20)                                         | 101.7207                                                | 13338.2768                                         | 12401.0270                                          | 25841.0245                                                       | 25841.0311                                                          | -0.0066                                                                     |
| 19  | 0        | <i>f</i> | $1^3\Pi(17, 19)\sim 2^1\Sigma^+(18, 19)$                                                 | T                                                                                        | (0, 20)                                         | 101.7207                                                | 13479.4727                                         | 12259.8168                                          | 25841.0102                                                       | 25841.0311                                                          | -0.0209                                                                     |
| 19  | 0        | <i>f</i> | $1^3\Pi(17, 19)\sim 2^1\Sigma^+(18, 19)$                                                 | T                                                                                        | (0, 20)                                         | 101.7207                                                | 13479.4727                                         | 12259.8288                                          | 25841.0222                                                       | 25841.0311                                                          | -0.0089                                                                     |
| 20  | 0        | <i>e</i> | $2^1\Sigma^+(16, 19)$                                                                    |                                                                                          | (0, 18)                                         | 94.3237                                                 | 13345.6738                                         | 12402.8334                                          | 25842.8309                                                       | 25842.8129                                                          | 0.0180                                                                      |
| 20  | 0        | <i>e</i> | $2^1\Sigma^+(16, 19)$                                                                    |                                                                                          | (0, 18)                                         | 94.3237                                                 | 13345.6738                                         | 12402.8331                                          | 25842.8306                                                       | 25842.8129                                                          | 0.0177                                                                      |
| 20  | 0        | <i>e</i> | $2^1\Sigma^+(16, 19)$                                                                    |                                                                                          | (0, 18)                                         | 94.3237                                                 | 13345.6738                                         | 12402.8364                                          | 25842.8339                                                       | 25842.8129                                                          | 0.0210                                                                      |
| 20  | 0        | <i>e</i> | $2^1\Sigma^+(16, 19)$                                                                    |                                                                                          | (0, 20)                                         | 101.7207                                                | 13338.2768                                         | 12402.8350                                          | 25842.8325                                                       | 25842.8129                                                          | 0.0196                                                                      |
| 20  | 0        | <i>e</i> | $2^1\Sigma^+(16, 19)$                                                                    |                                                                                          | (0, 20)                                         | 101.7207                                                | 13338.2768                                         | 12402.8358                                          | 25842.8333                                                       | 25842.8129                                                          | 0.0204                                                                      |
| 20  | 0        | <i>e</i> | $2^1\Sigma^+(16, 19)$                                                                    |                                                                                          | (0, 20)                                         | 101.7207                                                | 13338.2768                                         | 12402.8369                                          | 25842.8344                                                       | 25842.8129                                                          | 0.0215                                                                      |
| 20  | 0        | <i>e</i> | $1^3\Pi(17, 19)\sim 2^1\Sigma^+(18, 19)$                                                 | T                                                                                        | (0, 20)                                         | 101.7207                                                | 13479.4727                                         | 12261.6319                                          | 25842.8253                                                       | 25842.8129                                                          | 0.0124                                                                      |
| 20  | 0        | <i>e</i> | $1^3\Pi(17, 19)\sim 2^1\Sigma^+(18, 19)$                                                 | T                                                                                        | (0, 20)                                         | 101.7207                                                | 13479.4727                                         | 12261.6233                                          | 25842.8167                                                       | 25842.8129                                                          | 0.0038                                                                      |
| 20  | 0        | <i>e</i> | $1^3\Pi(17, 19)\sim 2^1\Sigma^+(18, 19)$                                                 | T                                                                                        | (0, 20)                                         | 101.7207                                                | 13479.4727                                         | 12261.6218                                          | 25842.8152                                                       | 25842.8129                                                          | 0.0023                                                                      |
| 20  | 0        | <i>e</i> | $1^3\Pi(17, 21)\sim 2^1\Sigma^+(18, 21)$                                                 | T                                                                                        | (0, 20)                                         | 101.7207                                                | 13486.3459                                         | 12254.7603                                          | 25842.8269                                                       | 25842.8129                                                          | 0.0140                                                                      |

| $J$ | $\Omega$ | $e/f$    | intermediate<br>state level<br>$1(b)^3\Pi(v, J)$ or<br>$2(A)^1\Sigma^+(v, J)$ or mixture | predominant<br>character<br>(singlet or<br>triplet) of<br>mixed<br>intermediate<br>state | ground<br>state level<br>$1(X)^1\Sigma^+(v, J)$ | ground<br>state level<br>energy<br>( $\text{cm}^{-1}$ ) | PUMP<br>laser<br>frequency<br>( $\text{cm}^{-1}$ ) | PROBE<br>laser<br>frequency<br>( $\text{cm}^{-1}$ ) | $E[3^1\Pi(v=6, J)]$<br>measured<br>value<br>( $\text{cm}^{-1}$ ) | $E[3^1\Pi(v=6, J)]$<br>from<br>calculations<br>( $\text{cm}^{-1}$ ) | $E[\text{measured}]$<br>–<br>$E[\text{calculated}]$<br>( $\text{cm}^{-1}$ ) |
|-----|----------|----------|------------------------------------------------------------------------------------------|------------------------------------------------------------------------------------------|-------------------------------------------------|---------------------------------------------------------|----------------------------------------------------|-----------------------------------------------------|------------------------------------------------------------------|---------------------------------------------------------------------|-----------------------------------------------------------------------------|
| 20  | 0        | <i>e</i> | $1^3\Pi(17, 21)\sim 2^1\Sigma^+(18, 21)$                                                 | T                                                                                        | (0, 20)                                         | 101.7207                                                | 13486.3459                                         | 12254.7613                                          | 25842.8279                                                       | 25842.8129                                                          | 0.0150                                                                      |
| 20  | 0        | <i>e</i> | $1^3\Pi(17, 21)\sim 2^1\Sigma^+(18, 21)$                                                 | T                                                                                        | (0, 22)                                         | 109.8732                                                | 13478.1874                                         | 12254.7629                                          | 25842.8235                                                       | 25842.8129                                                          | 0.0106                                                                      |
| 20  | 0        | <i>e</i> | $1^3\Pi(17, 21)\sim 2^1\Sigma^+(18, 21)$                                                 | T                                                                                        | (0, 22)                                         | 109.8732                                                | 13478.1874                                         | 12254.7615                                          | 25842.8221                                                       | 25842.8129                                                          | 0.0092                                                                      |
| 21  | 0        | <i>e</i> | $1^3\Pi(17, 20)\sim 2^1\Sigma^+(18, 20)$                                                 | T                                                                                        | (0, 19)                                         | 97.9277                                                 | 13486.6555                                         | 12260.1499                                          | 25844.7331                                                       | 25844.6958                                                          | 0.0373                                                                      |
| 25  | 0        | <i>e</i> | $1^3\Pi(17, 26)\sim 2^1\Sigma^+(18, 26)$                                                 | T                                                                                        | (0, 25)                                         | 123.5164                                                | 13488.0442                                         | 12241.5881                                          | 25853.1487                                                       | 25853.0663                                                          | 0.0824                                                                      |
| 25  | 0        | <i>e</i> | $1^3\Pi(17, 26)\sim 2^1\Sigma^+(18, 26)$                                                 | T                                                                                        | (0, 25)                                         | 123.5164                                                | 13488.0442                                         | 12241.5876                                          | 25853.1482                                                       | 25853.0663                                                          | 0.0819                                                                      |
| 25  | 0        | <i>e</i> | $1^3\Pi(17, 26)\sim 2^1\Sigma^+(18, 26)$                                                 | T                                                                                        | (0, 25)                                         | 123.5164                                                | 13488.0442                                         | 12241.5874                                          | 25853.1480                                                       | 25853.0663                                                          | 0.0817                                                                      |
| 26  | 1        | <i>f</i> | $2^1\Sigma^+(16, 26)$                                                                    |                                                                                          | (0, 25)                                         | 123.5164                                                | 13336.0915                                         | 12399.7213                                          | 25859.3292                                                       | 25859.2993                                                          | 0.0299                                                                      |
| 27  | 0        | <i>e</i> | $1^3\Pi(17, 26)\sim 2^1\Sigma^+(18, 26)$                                                 | T                                                                                        | (0, 25)                                         | 123.5164                                                | 13488.0442                                         | 12246.0527                                          | 25857.6133                                                       | 25857.7467                                                          | -0.1334                                                                     |
| 27  | 0        | <i>e</i> | $1^3\Pi(17, 26)\sim 2^1\Sigma^+(18, 26)$                                                 | T                                                                                        | (0, 25)                                         | 123.5164                                                | 13488.0442                                         | 12246.0538                                          | 25857.6144                                                       | 25857.7467                                                          | -0.1323                                                                     |
| 27  | 1        | <i>e</i> | $2^1\Sigma^+(16, 26)$                                                                    |                                                                                          | (0, 25)                                         | 123.5164                                                | 13336.0915                                         | 12402.1363                                          | 25861.7442                                                       | 25861.7282                                                          | 0.0160                                                                      |
| 27  | 1        | <i>f</i> | $2^1\Sigma^+(16, 27)$                                                                    |                                                                                          | (0, 26)                                         | 128.4408                                                | 13334.4530                                         | 12398.8502                                          | 25861.7440                                                       | 25861.7280                                                          | 0.0160                                                                      |
| 27  | 1        | <i>f</i> | $2^1\Sigma^+(16, 27)$                                                                    |                                                                                          | (0, 26)                                         | 128.4408                                                | 13334.4530                                         | 12398.8488                                          | 25861.7426                                                       | 25861.7280                                                          | 0.0146                                                                      |
| 27  | 1        | <i>f</i> | $2^1\Sigma^+(16, 27)$                                                                    |                                                                                          | (0, 28)                                         | 138.8539                                                | 13324.0399                                         | 12398.8531                                          | 25861.7469                                                       | 25861.7280                                                          | 0.0189                                                                      |
| 28  | 1        | <i>e</i> | $2^1\Sigma^+(16, 27)$                                                                    |                                                                                          | (0, 28)                                         | 138.8539                                                | 13324.0399                                         | 12401.3330                                          | 25864.2268                                                       | 25864.2170                                                          | 0.0098                                                                      |
| 28  | 1        | <i>f</i> | $2^1\Sigma^+(16, 28)$                                                                    |                                                                                          | (0, 27)                                         | 133.5534                                                | 13332.7417                                         | 12397.9371                                          | 25864.2322                                                       | 25864.2157                                                          | 0.0165                                                                      |
| 29  | 1        | <i>e</i> | $2^1\Sigma^+(16, 30)$                                                                    |                                                                                          | (0, 31)                                         | 155.8817                                                | 13317.5770                                         | 12393.3561                                          | 25866.8148                                                       | 25866.8130                                                          | 0.0018                                                                      |
| 29  | 1        | <i>e</i> | $2^1\Sigma^+(16, 30)$                                                                    |                                                                                          | (0, 31)                                         | 155.8817                                                | 13317.5770                                         | 12393.3575                                          | 25866.8162                                                       | 25866.8130                                                          | 0.0032                                                                      |
| 29  | 1        | <i>e</i> | $2^1\Sigma^+(16, 30)$                                                                    |                                                                                          | (0, 31)                                         | 155.8817                                                | 13317.5770                                         | 12393.3573                                          | 25866.8160                                                       | 25866.8130                                                          | 0.0030                                                                      |
| 34  | 2        | <i>e</i> | $2^1\Sigma^+(16, 35)$                                                                    |                                                                                          | (0, 34)                                         | 174.5956                                                | 13318.8890                                         | 12391.6350                                          | 25885.1196                                                       | 25885.1449                                                          | -0.0253                                                                     |
| 34  | 2        | <i>e</i> | $2^1\Sigma^+(16, 35)$                                                                    |                                                                                          | (0, 34)                                         | 174.5956                                                | 13318.8890                                         | 12391.6391                                          | 25885.1237                                                       | 25885.1449                                                          | -0.0212                                                                     |
| 34  | 2        | <i>f</i> | $2^1\Sigma^+(16, 34)$                                                                    |                                                                                          | (0, 33)                                         | 168.1706                                                | 13321.0645                                         | 12395.8888                                          | 25885.1239                                                       | 25885.1448                                                          | -0.0209                                                                     |
| 35  | 2        | <i>e</i> | $2^1\Sigma^+(16, 34)$                                                                    |                                                                                          | (0, 33)                                         | 168.1706                                                | 13321.0645                                         | 12398.9862                                          | 25888.2213                                                       | 25888.2316                                                          | -0.0103                                                                     |
| 35  | 2        | <i>e</i> | $2^1\Sigma^+(16, 34)$                                                                    |                                                                                          | (0, 33)                                         | 168.1706                                                | 13321.0645                                         | 12398.9858                                          | 25888.2209                                                       | 25888.2316                                                          | -0.0107                                                                     |
| 35  | 2        | <i>f</i> | $2^1\Sigma^+(16, 35)$                                                                    |                                                                                          | (0, 34)                                         | 174.5956                                                | 13318.8890                                         | 12394.7507                                          | 25888.2353                                                       | 25888.2312                                                          | 0.0041                                                                      |
| 35  | 2        | <i>f</i> | $2^1\Sigma^+(16, 35)$                                                                    |                                                                                          | (0, 34)                                         | 174.5956                                                | 13318.8890                                         | 12394.7508                                          | 25888.2354                                                       | 25888.2312                                                          | 0.0042                                                                      |
| 35  | 2        | <i>f</i> | $2^1\Sigma^+(16, 35)$                                                                    |                                                                                          | (0, 34)                                         | 174.5956                                                | 13318.8890                                         | 12394.7516                                          | 25888.2362                                                       | 25888.2312                                                          | 0.0050                                                                      |
| 35  | 2        | <i>f</i> | $2^1\Sigma^+(16, 35)$                                                                    |                                                                                          | (0, 34)                                         | 174.5956                                                | 13318.8890                                         | 12394.7516                                          | 25888.2362                                                       | 25888.2312                                                          | 0.0050                                                                      |
| 35  | 2        | <i>f</i> | $2^1\Sigma^+(16, 35)$                                                                    |                                                                                          | (0, 36)                                         | 188.0058                                                | 13305.4788                                         | 12394.7520                                          | 25888.2366                                                       | 25888.2312                                                          | 0.0054                                                                      |
| 36  | 2        | <i>e</i> | $2^1\Sigma^+(16, 35)$                                                                    |                                                                                          | (0, 34)                                         | 174.5956                                                | 13318.8890                                         | 12397.9253                                          | 25891.4099                                                       | 25891.3987                                                          | 0.0112                                                                      |
| 36  | 2        | <i>e</i> | $2^1\Sigma^+(16, 35)$                                                                    |                                                                                          | (0, 34)                                         | 174.5956                                                | 13318.8890                                         | 12397.9253                                          | 25891.4099                                                       | 25891.3987                                                          | 0.0112                                                                      |
| 36  | 2        | <i>e</i> | $2^1\Sigma^+(16, 35)$                                                                    |                                                                                          | (0, 36)                                         | 188.0058                                                | 13305.4788                                         | 12397.9289                                          | 25891.4135                                                       | 25891.3987                                                          | 0.0148                                                                      |
| 37  | 0        | <i>e</i> | $1^3\Pi(12, 38)\sim 2^1\Sigma^+(11, 38)$                                                 | T                                                                                        | (0, 37)                                         | 194.9907                                                | 12934.4448                                         | 12756.4450                                          | 25885.8805                                                       | 25885.8798                                                          | 0.0007                                                                      |
| 39  | 0        | <i>e</i> | $1^3\Pi(12, 38)\sim 2^1\Sigma^+(11, 38)$                                                 | T                                                                                        | (0, 37)                                         | 194.9907                                                | 12934.4448                                         | 12762.9597                                          | 25892.3952                                                       | 25892.4153                                                          | -0.0201                                                                     |
| 44  | 0        | <i>e</i> | $1^3\Pi(18, 45)\sim 2^1\Sigma^+(20, 45)$                                                 | T                                                                                        | (0, 46)                                         | 266.2096                                                | 13572.0030                                         | 12071.8072                                          | 25910.0198                                                       | 25910.0239                                                          | -0.0041                                                                     |
| 44  | 0        | <i>e</i> | $1^3\Pi(18, 45)\sim 2^1\Sigma^+(20, 45)$                                                 | S                                                                                        | (0, 46)                                         | 266.2096                                                | 13567.5007                                         | 12076.3095                                          | 25910.0198                                                       | 25910.0239                                                          | -0.0041                                                                     |
| 46  | 0        | <i>e</i> | $1^3\Pi(18, 45)\sim 2^1\Sigma^+(20, 45)$                                                 | T                                                                                        | (0, 46)                                         | 266.2096                                                | 13572.0030                                         | 12079.3968                                          | 25917.6094                                                       | 25917.5674                                                          | 0.0420                                                                      |
| 86  | 0        | <i>e</i> | $1^3\Pi(22, 87)\sim 2^1\Sigma^+(28, 87)$                                                 | T                                                                                        | (4, 86)                                         | 1232.1940                                               | 13488.0442                                         | 11417.4697                                          | 26137.7079                                                       | 26137.7080                                                          | -0.0001                                                                     |
